# Supplementary material for: Endothelium-Dependent Induction of Vasculogenic Mimicry in Human Triple-Negative Breast Cancer Cells Is Inhibited by Calcitriol and Curcumin
Source: MDPI journal article supplement (doi:10.3390/ijms23147659), 2022-07-11
Supplement: s1 [file s1]

# Supplementary Figure S1

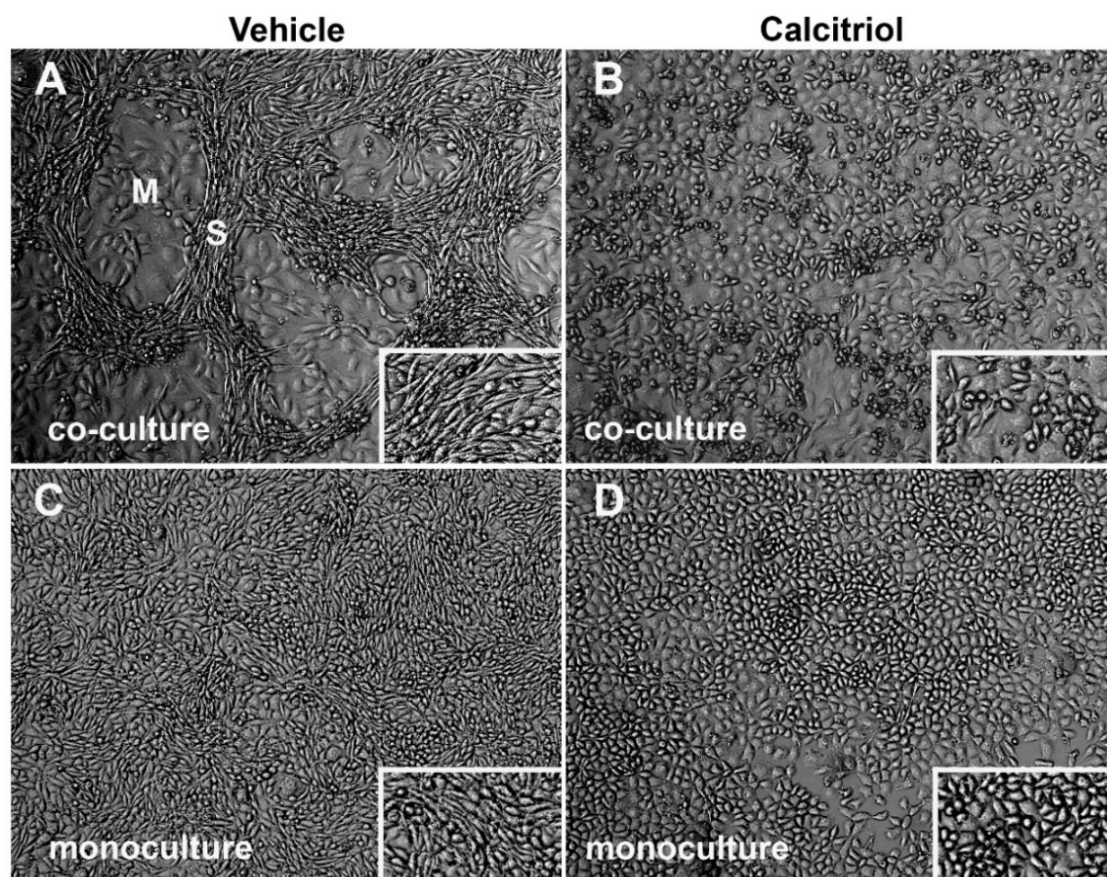

**Figure S1. Calcitriol induced a morphological cell change from spindle-like to cobblestone shape in co-cultures and monocultures of TNBC cells.** Co-cultures of endothelial cells with TNBC cells (A,B) or TNBC cells in monoculture (C,D), were treated with vehicle (A,C) or 10 nM calcitriol (B,D) for 2 days. Afterward, bright-field images were acquired by conventional microscopy (10 $\times$ ), and representative images are shown. M and S stand for mesh and segment, respectively, to illustrate these structures. Insets show an amplified part of corresponding image.

**Supplementary Figure S2**

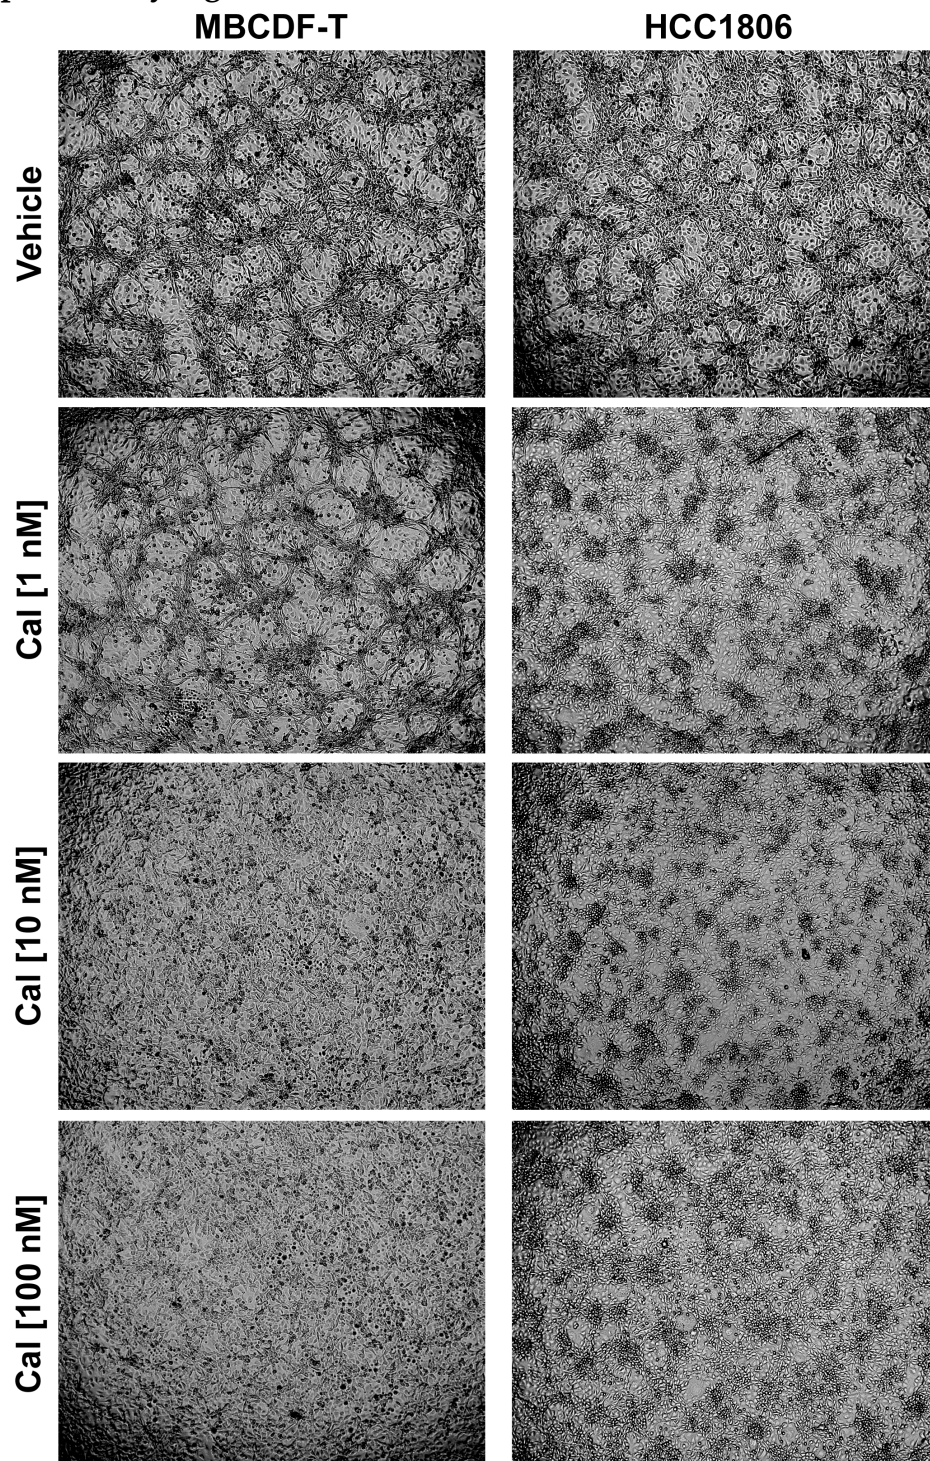

**Figure S2. Dose-response anti-VM effect of calcitriol in co-cultures of two different TNBC cells with endothelial cells.** Co-cultures of MBCDF-T/EA.hy926 and HCC1806/EA.hy926 were exposed to increasing calcitriol (Cal) concentrations or its vehicle for 2 days, and live cells were photographed at 4× magnification. Representative pictures are shown.

Supplementary Figure S3

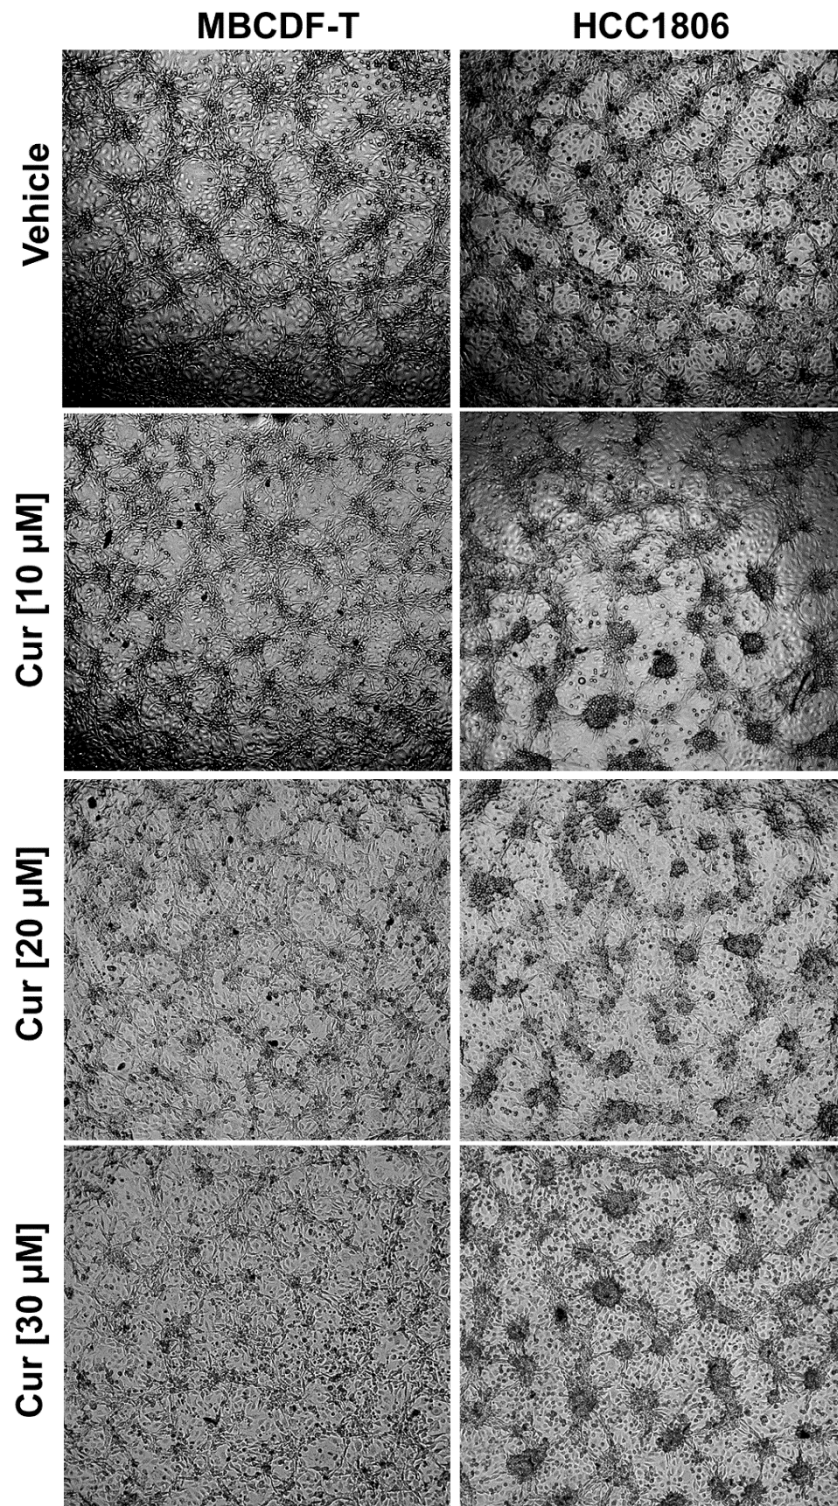

**Figure S3. Dose-response anti-VM effect of curcumin in co-cultures of two different TNBC cells with endothelial cells.** Co-cultures of MBCDF-T/EA.hy926 and HCC1806/EA.hy926 were exposed to increasing curcumin (Cur) concentrations or its vehicle for 2 days, and live cells were photographed at 4 $\times$  magnification. Representative pictures are shown.

## Supplementary Figure S4

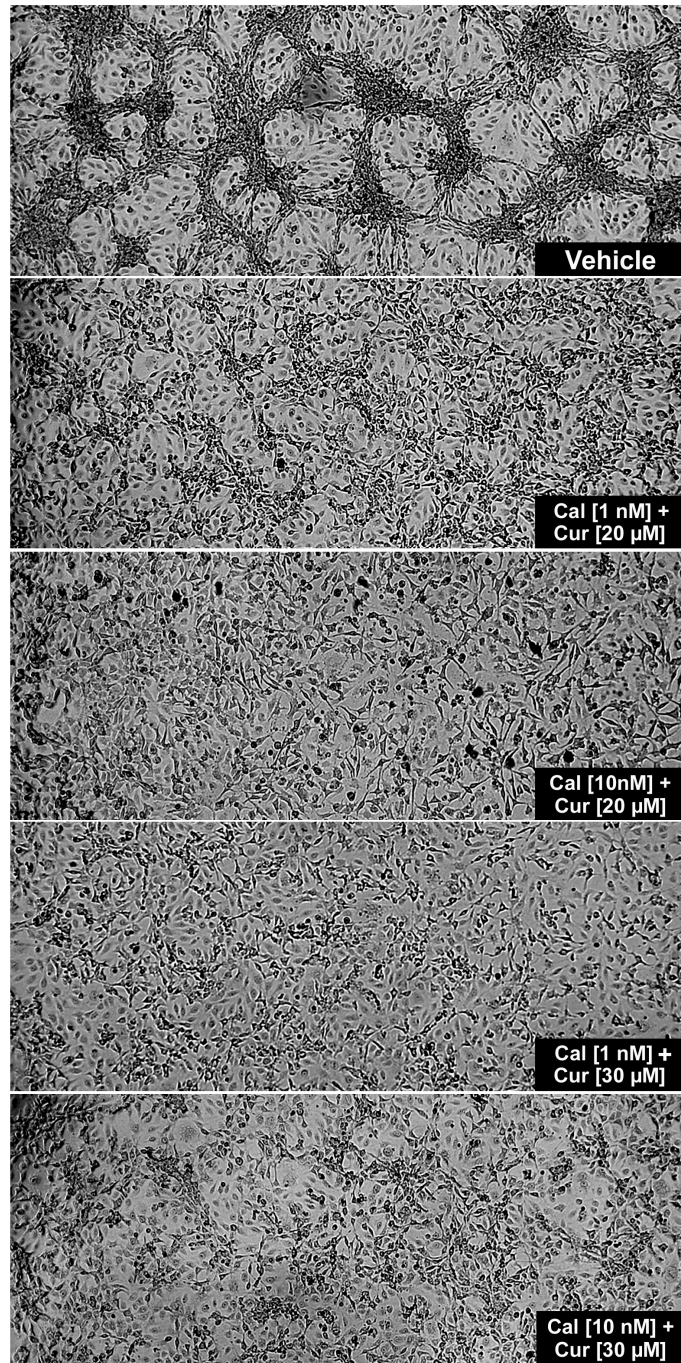

**Figure S4. Different combinations of calcitriol and curcumin strongly inhibited VM in MBCDF-T TNBC cells.** The anti-VM effect of calcitriol in combination with curcumin in co-cultures of MBCDF-T/EA.hy926 is shown. Co-cultures were exposed to the indicated calcitriol (Cal) and curcumin (Cur) concentrations or their vehicle (0.1% ethanol) for 2 days, and live cells were photographed at 10× magnification. Representative pictures are shown.



## Supplementary Figure S5

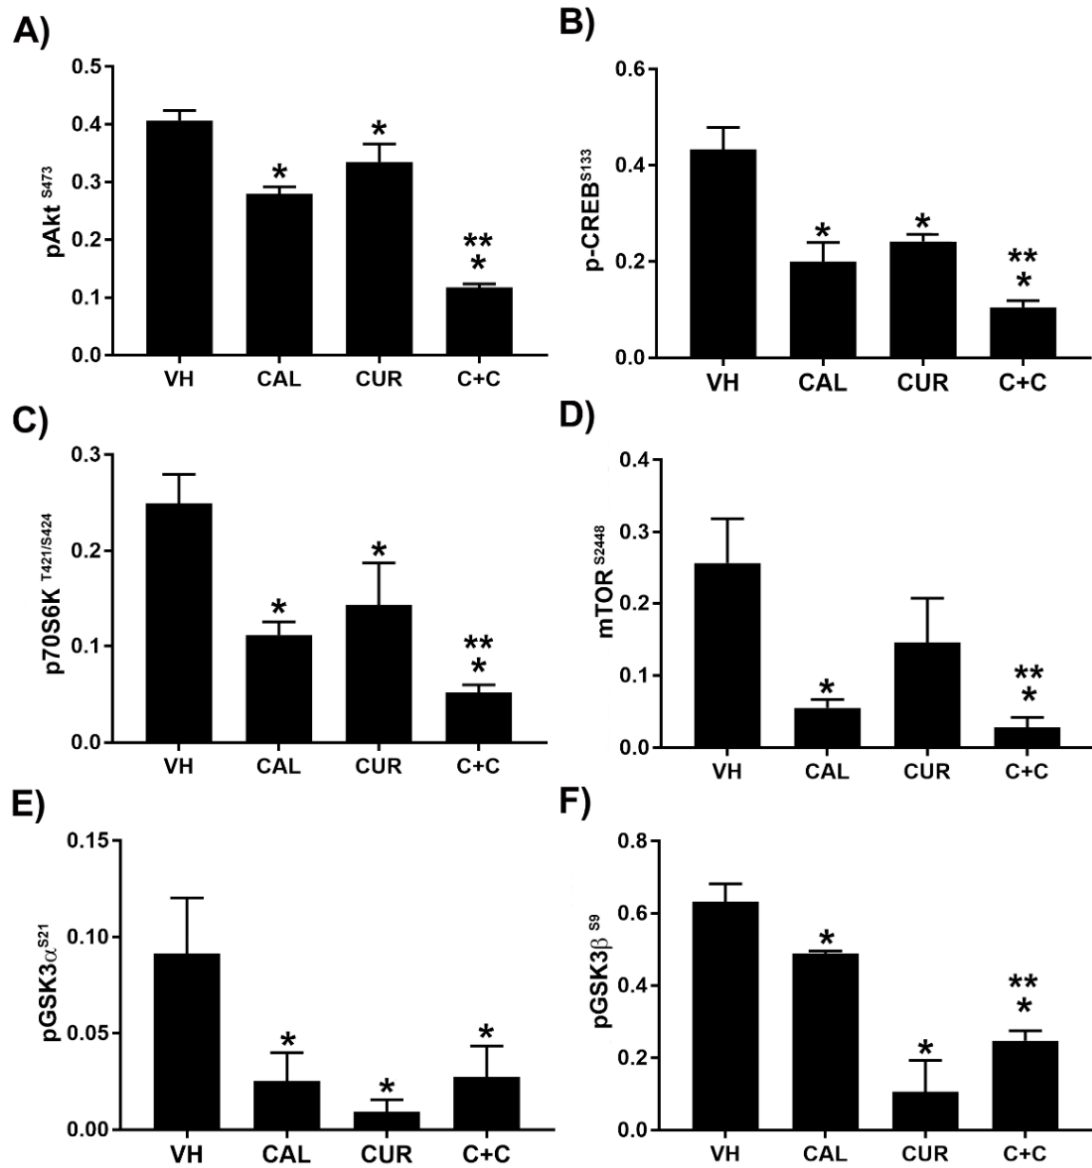

**Figure S5. Effect of calcitriol and curcumin treatment on the protein phosphorylation status in endothelial and TNBC co-cultures.** Graphical representation of the relative abundance of the phosphorylated kinases in MBCDF-T/EA.hy926 co-cultures exposed to vehicle (VH), calcitriol (CAL, 10 nM), curcumin (CUR, 20  $\mu$ M) or their combination (C+C) for 24 h. Optical densitometric analysis of selected targets from the multiplex antibody array was analyzed by One way ANOVA. The chosen phosphorylated kinases analyzed were: (A) Akt (B) CREB, (C) p70S6K, (D) mTOR, (E) Gsk3 $\alpha$  and (F) Gsk3 $\beta$ . Bars represent mean  $\pm$  SEM, n = 4. \*  $p$  < 0.05 vs. VH, \*\*  $p$  < 0.05 vs. each compound alone.
